# Supplementary material for: The Evolutionary Dynamics of Protein-Protein Interaction Networks Inferred from the Reconstruction of Ancient Networks
Source: PubMed Central journal article supplement (PMC3603955; doi:10.1371/journal.pone.0058134), 2013-03-20
Supplement: pone.0058134.s012.pdf [file pone.0058134.s012.pdf]

| Species | Exp score > 0 |              | Conserved on all eggNOG levels |              | After filtering at $s_c^*$ |              | After filtering at $s_c^*$ largest component |              |
|---------|---------------|--------------|--------------------------------|--------------|----------------------------|--------------|----------------------------------------------|--------------|
|         | proteins      | interactions | proteins                       | interactions | proteins                   | interactions | proteins                                     | interactions |
| eco     | 2472          | 11016        | 2472                           | 11016        | 873                        | 2321         | 705                                          | 2209         |
| sce     | 5388          | 124956       | 4197                           | 75625        | 2144                       | 6000         | 1609                                         | 5546         |
| ath     | 1913          | 3513         | 1104                           | 1792         | 727                        | 905          | 404                                          | 618          |
| cel     | 3370          | 6768         | 997                            | 1391         | 485                        | 438          | 249                                          | 271          |
| dme     | 5376          | 8695         | 2213                           | 2915         | 461                        | 598          | 311                                          | 504          |
| mmu     | 3513          | 5623         | 1321                           | 1573         | 718                        | 658          | 285                                          | 351          |
| hsa     | 10617         | 51573        | 5445                           | 19040        | 1891                       | 2840         | 1365                                         | 2435         |
