# Supplementary material for: The Evolutionary Dynamics of Protein-Protein Interaction Networks Inferred from the Reconstruction of Ancient Networks
Source: PubMed Central journal article supplement (PMC3603955; doi:10.1371/journal.pone.0058134), 2013-03-20
Supplement: pone.0058134.s013.pdf [file pone.0058134.s013.pdf]

| eggNOG level | Divergence time (million years) |
|--------------|---------------------------------|
| COG/NOG      | 2313.2                          |
| KOG/euNOG    | 1369                            |
| fuNOG        | 798                             |
| meNOG        | 782.7                           |
| inNOG        | 366                             |
| veNOG        | 400.1                           |
| maNOG        | 92.4                            |
| roNOG        | 25.2                            |
| prNOG        | 6.4                             |
